# Supplementary material
Source: PubMed Central journal article supplement (PMC6990799)
Supplement: jamapediatr-174-241-s002.pdf [file jamapediatr-174-241-s002.pdf]

## Supplementary Online Content

Miller E, Jones KA, Ripper L, Paglisotti T, Mulbah P, Abebe KZ. An athletic coach-delivered middle school gender violence prevention program: a cluster randomized clinical trial. *JAMA Pediatr*. Published online January 13, 2020.  
doi:10.1001/jamapediatrics.2019.5217

**eTable.** Individual Youth-Level Outcome Measures

**eTable. Individual Youth-Level Outcome Measures**

| Construct                                                                  | Items                                                                                                                                                                                                                                                                                                                                                                                                                                                                                                                                                                                                                                                                                                                                                                                                                                                                                                                                                                                                                                                                        | Response Options                                                                                                                                                                                                                                                                                                                                                                                                                                                                                                                                                                                                                                                                                                                                                                                                                                                                                                                      |
|----------------------------------------------------------------------------|------------------------------------------------------------------------------------------------------------------------------------------------------------------------------------------------------------------------------------------------------------------------------------------------------------------------------------------------------------------------------------------------------------------------------------------------------------------------------------------------------------------------------------------------------------------------------------------------------------------------------------------------------------------------------------------------------------------------------------------------------------------------------------------------------------------------------------------------------------------------------------------------------------------------------------------------------------------------------------------------------------------------------------------------------------------------------|---------------------------------------------------------------------------------------------------------------------------------------------------------------------------------------------------------------------------------------------------------------------------------------------------------------------------------------------------------------------------------------------------------------------------------------------------------------------------------------------------------------------------------------------------------------------------------------------------------------------------------------------------------------------------------------------------------------------------------------------------------------------------------------------------------------------------------------------------------------------------------------------------------------------------------------|
| <b>Primary Outcome (Positive Bystander Behavior only)</b>                  |                                                                                                                                                                                                                                                                                                                                                                                                                                                                                                                                                                                                                                                                                                                                                                                                                                                                                                                                                                                                                                                                              |                                                                                                                                                                                                                                                                                                                                                                                                                                                                                                                                                                                                                                                                                                                                                                                                                                                                                                                                       |
| <b>Positive and negative bystander intervention behaviors<sup>20</sup></b> | <p><i>Participants were asked how they responded to witnessing the following behaviors among male peers in the past three months:</i></p> <ol style="list-style-type: none"> <li>1. Making rude or disrespectful comments about a girl's body, clothing, or make-up.</li> <li>2. Spreading rumors about a girl's sexual reputation, like saying "she's easy to get with."</li> <li>3. Telling sexual jokes that disrespect women and girls.</li> <li>4. Bragging about what they and their girlfriend do sexually.</li> <li>5. Showing other people sexual messages or naked/sexual pictures of a girl on a cell phone or the internet.</li> <li>6. Doing unwelcome or uninvited things toward a girl (or group of girls) such as howling, whistling, or making sexual gestures.</li> <li>7. Fighting with a girl where he's starting to cuss at or threaten her.</li> <li>8. Taking sexual advantage of a girl (like touching, kissing, having sex with) who is drunk or high from drugs.</li> <li>9. Shoving, grabbing, or otherwise physically hurting a girl.</li> </ol> | <p>Check all that apply (excluding not having experienced)</p> <ul style="list-style-type: none"> <li>• I have not experienced this in the past 3 months.</li> <li>• I didn't say anything.<sup>†</sup></li> <li>• I told the person in public that acting like that was not okay.*</li> <li>• I laughed or went along with it.<sup>†</sup></li> <li>• I told the person in private that acting like that was not okay.*</li> <li>• I talked to our coach about it privately.*</li> <li>• I talked to another adult (not coach).*</li> </ul> <p>Coding: Endorsement of at least one positive (indicated by *) response per behavior witnessed added +1 to create a positive bystander behavior summary score across all 9 items (range 0-9). Endorsement of at least one negative (indicated by †) response per behavior witnessed added +1 to create a negative bystander behavior summary score across all 9 items (range 0-9).</p> |
| <b>Secondary Outcomes</b>                                                  |                                                                                                                                                                                                                                                                                                                                                                                                                                                                                                                                                                                                                                                                                                                                                                                                                                                                                                                                                                                                                                                                              |                                                                                                                                                                                                                                                                                                                                                                                                                                                                                                                                                                                                                                                                                                                                                                                                                                                                                                                                       |
| <b>Recognition of ARA<sup>26</sup></b>                                     | <p><i>Participants were asked how abusive they perceived the following behaviors to be in a dating relationship:</i></p> <ol style="list-style-type: none"> <li>1. Name calling or insulting them.</li> <li>2. Telling them they're ugly or stupid.</li> <li>3. Making fun of them in front of other people.</li> <li>4. Telling them what to do all the time.</li> <li>5. Telling them which friends they can and can't see or talk to.</li> <li>6. Pressuring them not to break up with them.</li> <li>7. Not listening to what they have to say.</li> <li>8. Trying to convince them to have sex.</li> <li>9. Preventing them from leaving a room.</li> <li>10. Keeping tabs on them or spying on them.</li> <li>11. Threatening to hit them.</li> <li>12. Forcing them to have sex.</li> </ol>                                                                                                                                                                                                                                                                           | <p>5 point Likert scale from 'not abusive' to 'extremely abusive'</p> <p>Coding: Modeled as a mean score; higher scores indicate more abuse recognition</p>                                                                                                                                                                                                                                                                                                                                                                                                                                                                                                                                                                                                                                                                                                                                                                           |

|                                                        |                                                                                                                                                                                                                                                                                                                                                                                                                                                                                                                                                                                                                                                                                                                                                                                                                                                                                                                                                                                                                                                              |                                                                                                                                                                                                                                                                                                                                                                            |
|--------------------------------------------------------|--------------------------------------------------------------------------------------------------------------------------------------------------------------------------------------------------------------------------------------------------------------------------------------------------------------------------------------------------------------------------------------------------------------------------------------------------------------------------------------------------------------------------------------------------------------------------------------------------------------------------------------------------------------------------------------------------------------------------------------------------------------------------------------------------------------------------------------------------------------------------------------------------------------------------------------------------------------------------------------------------------------------------------------------------------------|----------------------------------------------------------------------------------------------------------------------------------------------------------------------------------------------------------------------------------------------------------------------------------------------------------------------------------------------------------------------------|
| <b>Gender-equitable attitudes<sup>27</sup></b>         | <p><i>Participants were asked how much they agree with the following statements:</i></p> <ol style="list-style-type: none"> <li>1. A guy takes responsibility for his actions.</li> <li>2. A guy never needs to hit another guy to get respect.</li> <li>3. A girl wearing revealing clothing deserves to have comments made about her.</li> <li>4. It bothers me when a guy acts like a girl.</li> <li>5. Guys should sleep with as many girls as possible.</li> <li>6. If a guy tells people his worries, he will look weak.</li> <li>7. In a good dating relationship, the guy gets his way most of the time.</li> <li>8. Guys should only have sex with girls.</li> <li>9. I can respect a guy who backs down from a fight.</li> <li>10. I would be friends with a guy who is gay.</li> <li>11. A guy should share in household chores (for example washing dishes, vacuuming).</li> <li>12. If a girl is raped (forced to have sex) it is often because she did not say "no" clearly enough.</li> <li>13. Guys put women and children first.</li> </ol> | <p>5 point Likert scale from 'strongly disagree' to 'strongly agree'</p> <p>Coding: Applicable items were reverse-coded so that higher scores indicate more gender equitable attitudes; modeled as a mean score</p>                                                                                                                                                        |
| <b>Intentions to intervene with peers<sup>20</sup></b> | <p><i>Participants were asked how likely they were to intervene when observing the following behaviors among peers:</i></p> <ol style="list-style-type: none"> <li>1. Making rude or disrespectful comments about a girl's body, clothing or make-up.</li> <li>2. Spreading rumors about a girl's sexual reputation, like saying she's 'easy to get with'.</li> <li>3. Fighting with a girl where he's starting to cuss at or threaten her.</li> <li>4. Doing unwelcome or uninvited things toward a girl (or group of girls) such as howling, whistling or making sexual gestures.</li> <li>5. Shoving, grabbing, or otherwise physically hurting a girl.</li> <li>6. Showing other people sexual messages or naked/sexual pictures of a girl on a cell phone or the internet.</li> <li>7. Telling sexual jokes that disrespect women and girls.</li> <li>8. Taking sexual advantage of a girl (like touching, kissing, having sex with) who is drunk, high from drugs, or passed out.</li> </ol>                                                           | <p>5 point Likert scale from 'very unlikely' to 'very likely,'</p> <p>Coding: Modeled as a mean score; higher scores indicate stronger intentions to intervene.</p>                                                                                                                                                                                                        |
| <b>Dating abuse perpetration<sup>20</sup></b>          | <p><i>If participants reported having ever been in a dating relationship at the time of the survey, they were asked if they had done any of the following behaviors to someone with whom they were in a relationship:</i></p> <ol style="list-style-type: none"> <li>1. Spread rumors about their sexual reputation, like telling people they're 'easy'.</li> <li>2. Convinced them to have sex, after they had said no a few times.</li> <li>3. Made them have sex when they didn't want to.</li> <li>4. Physically hurt them (like shoving, grabbing, slapping, punching, choking).</li> <li>5. Threatened to hurt them if they didn't do what you wanted them to do.</li> <li>6. Yelled at them or destroyed something that belonged to them.</li> </ol>                                                                                                                                                                                                                                                                                                  | <p>Select one:</p> <ul style="list-style-type: none"> <li>• I have not been in a relationship</li> <li>• Yes, I have done this in the past 3 months</li> <li>• Yes, I have done this, but not in the past 3 months</li> <li>• No, I have never done this</li> </ul> <p>Coding: Modeled as a dichotomized variable, where answering 'yes I have done this in the past 3</p> |

|                                             |                                                                                                                                                                                                                                                                                                                                                                                                                                                                                                                                                                                                                                                                                                                                                                                                             |                                                                                                                                                                                                                                                                                                                                                                                                                 |
|---------------------------------------------|-------------------------------------------------------------------------------------------------------------------------------------------------------------------------------------------------------------------------------------------------------------------------------------------------------------------------------------------------------------------------------------------------------------------------------------------------------------------------------------------------------------------------------------------------------------------------------------------------------------------------------------------------------------------------------------------------------------------------------------------------------------------------------------------------------------|-----------------------------------------------------------------------------------------------------------------------------------------------------------------------------------------------------------------------------------------------------------------------------------------------------------------------------------------------------------------------------------------------------------------|
|                                             | <ol style="list-style-type: none"> <li>7. Called them names, like ugly or stupid.</li> <li>8. Told them not to talk to others or told them who they could hang out with.</li> <li>9. Showed friends or posted pictures of them naked or doing something sexual.</li> <li>10. Talked about what you and your partner do sexually with your friends or peers.</li> </ol>                                                                                                                                                                                                                                                                                                                                                                                                                                      | months' to any item was coded as a 1 (any dating abuse perpetration).                                                                                                                                                                                                                                                                                                                                           |
| <b>Exploratory Outcomes:</b>                |                                                                                                                                                                                                                                                                                                                                                                                                                                                                                                                                                                                                                                                                                                                                                                                                             |                                                                                                                                                                                                                                                                                                                                                                                                                 |
| <b>Homophobic teasing<sup>28</sup></b>      | <p><i>Participants were asked how often they said homophobic epithets ("call each other names like homo or gay") to the following people:</i></p> <ol style="list-style-type: none"> <li>1. ...to a friend?</li> <li>2. ...to someone you did not know well?</li> <li>3. ...to someone you did not like?</li> <li>4. ...to someone you did not think was gay or lesbian?</li> <li>5. ...to someone you thought was gay or lesbian?</li> </ol>                                                                                                                                                                                                                                                                                                                                                               | <p>Select one:</p> <ul style="list-style-type: none"> <li>• Never</li> <li>• A few times</li> <li>• Once or twice a month</li> <li>• Once or twice a week</li> <li>• Every day or almost every day</li> </ul> <p>Coding: Modeled as dichotomized variable, where answering any that were not "never" was coded as a 1 (any homophobic teasing perpetration).</p>                                                |
| <b>Sexual harassment<sup>9</sup></b>        | <p><i>Participants were asked how often they perpetrated the following behaviors against peers:</i></p> <ol style="list-style-type: none"> <li>1. Made unwelcome sexual comments, jokes, gestures, or looks?</li> <li>2. Showed, gave, or left sexual pictures, drawings, messages, or notes?</li> <li>3. Spread sexual rumors about them?</li> <li>4. Touched, grabbed, or pinched them in a sexual way?</li> <li>5. Forced them to kiss you?</li> </ol>                                                                                                                                                                                                                                                                                                                                                   | <p>Select one:</p> <ul style="list-style-type: none"> <li>• Never</li> <li>• A few times</li> <li>• Once or twice a month</li> <li>• Once or twice a week</li> <li>• Every day or almost every day</li> </ul> <p>Coding: Modeled as dichotomized variable, where answering any that were not "never" was coded as a 1 (any sexual harassment perpetration).</p>                                                 |
| <b>Cyber abuse and sexting<sup>30</sup></b> | <p><i>Participants were asked how often they perpetrated the following behaviors against peers using mobile apps, social networks, texts, or other digital communication in the past 3 months:</i></p> <ol style="list-style-type: none"> <li>1. ...make mean or hurtful comments...</li> <li>2. ...spread rumors...</li> <li>3. ...make threatening or aggressive comments...</li> <li>4. ... repeatedly contact them to see where they were and/or who they were with...</li> <li>5. ...try to get them to talk about sex when they did not want to...</li> <li>6. ...ask them to do something sexual that they did not want to do...</li> <li>7. ...post or publicly share a nude or semi-nude picture of them...</li> <li>8. ...ask them to send nude or semi-nude pictures of themselves...</li> </ol> | <p>Select one:</p> <ul style="list-style-type: none"> <li>• Never</li> <li>• A few times</li> <li>• Once or twice a month</li> <li>• Once or twice a week</li> <li>• Every day or almost every day</li> </ul> <p>Coding: Modeled as dichotomized variable, where answering any that were not "never" was coded as a 1 (any cyber abuse or sexting perpetration). Items 5-8 were coded as cyber sexual abuse</p> |

Note: All scales are measured at baseline, end of season, and one-year follow-up
