# Supplementary material
Source: PubMed Central journal article supplement (PMC6990799)
Supplement: jamapediatr-174-241-s003.pdf [file jamapediatr-174-241-s003.pdf]

# Data Sharing Statement

Miller. An Athletic Coach-Delivered Middle School Gender Violence Prevention Program. *JAMA Pediatr*. Published January 13, 2020. 10.1001/jamapediatrics.2019.5217

## Data

**Data available:** Yes

**Data types:** Deidentified participant data, Data dictionary

**How to access data:** [elizabeth.miller@chp.edu](mailto:elizabeth.miller@chp.edu)

**When available:** beginning date: 08-01-2020

## Supporting Documents

**Document types:** Informed consent form

**How to access documents:** [elizabeth.miller@chp.edu](mailto:elizabeth.miller@chp.edu)

**When available:** beginning date: 08-01-2020

## Additional Information

**Who can access the data:** Researchers whose proposed use of the data has been approved by the stakeholder advisory group involved in this study

**Types of analyses:** For a specified purpose

**Mechanisms of data availability:** After approval of a proposal and with a signed data access agreement
